# Supplementary material
Source: MDPI journal article supplement (https://www.mdpi.com/2226-471X/4/3/53)
Supplement: s1 [file s1]

**Table A** Correlation matrix of fixed factors (EP-German bilinguals)

|  | AoA of German | HL instruction | chronological age | input at home |
| --- | --- | --- | --- | --- |
| AoA of German | 1 | –.037 | .173** | .692*** |
| HL instruction |  | 1 | -.327*** | .869*** |
| chronological age |  |  | 1 | .506*** |
| input at home |  |  |  | 1 |

**p* < .05; ***p* < .01; ****p* < .001

**Table B** Correlation matrix of fixed factors (Polish-German bilinguals)

|  | AoA of German | HL instruction | chronological age | input at home |
| --- | --- | --- | --- | --- |
| AoA of German | 1 | .036 | –.203*** | .667*** |
| HL instruction |  | 1 | .614*** | .869*** |
| chronological age |  |  | 1 | -.168** |
| input at home |  |  |  | 1 |

**p* < .05; ***p* < .01; ****p* < .001
